# Supplementary material for: Preparation of efficient inverted tin-based perovskite solar cells via the bidentate coordination effect of 8-hydroxyquinoline
Source: Royal Society of Chemistry journal article supplement (doi:10.1039/d0cc01106a), 2020-01-01
Supplement: d0cc01106a1.pdf [file d0cc01106a1.pdf]

## Efficient Inverted Tin-based Perovskite Solar Cells via Bidentate Coordination Effect of 8-Hydroxyquinoline

*Zhuojia Lin<sup>a,b</sup>, Cong Liu<sup>a,b</sup>, Gengling Liu<sup>a,b</sup>, Jia Yang<sup>a,b</sup>, Licheng Tan<sup>\*a,b</sup>, Yiwang Chen<sup>\*a,b</sup>*

Z. Lin, C. Liu, G. Liu, J. Yang, Prof. Dr. L. Tan, Prof. Dr. Y. Chen

<sup>a</sup>College of Chemistry, Nanchang University, 999 Xuefu Avenue, Nanchang 330031,  
China

<sup>b</sup>Institute of Polymers and Energy Chemistry (IPEC), Nanchang University, 999  
Xuefu Avenue, Nanchang 330031, China

Corresponding author. Tel.: +86 791 83968703; Fax: +86 791 83969561; E-mail:  
ywchen@ncu.edu.cn (Y. C.); tanlicheng@ncu.edu.cn (L. T.).

### Experimental Section

**Materials:** Indium-tin oxide (ITO) glass (the sheet resistance of 15  $\Omega$  per sq and the transmittance of 86%) was purchased from South China Xiang Science and Technology Company, Ltd. PEDOT:PSS (aqueous dispersion, Clevios VP AI 4083) was obtained from Heraeus. Formamidinium iodide (FAI) (anhydrous, 99.99%), Tin (II) iodide ( $\text{SnI}_2$ , 99.99%), tin (II) fluoride ( $\text{SnF}_2$ , 99%), and bathocuproine (BCP, 96.0%), N,N-dimethylformamide (DMF, anhydrous, 99.8%), dimethyl sulfoxide (DMSO, anhydrous, 99.9%), and chlorobenzene (CB, anhydrous, 99.8%) were purchased from Sigma-Aldrich. PCBM (99%) was acquired from Xi'an Polymer Light Technology Corp.

**Device Fabrication:** The ITO glass substrates were ultrasonically cleaned by detergent, acetone, deionized water, and isopropyl alcohol for 15 min in series and finally were treated by oxygen plasma for 5 min. Then, the PEDOT:PSS solution was spin-coated onto the ITO substrates at 4000 rpm for 1min, followed by annealing at 140 °C for 20 min. The precursor solution was prepared by dissolving 1 M FAI, 1 M  $\text{SnI}_2$ , and 0.1 M  $\text{SnF}_2$  in 800  $\mu\text{L}$  DMF and 200  $\mu\text{L}$  DMSO with different mass fraction

of 8-Hydroxyquinoline to total mass of FAI and  $\text{SnI}_2$  in glovebox. The perovskite films were obtained by one-step method: the substrates were spun at 5000 rpm for 30s in glovebox, after 50  $\mu\text{L}$   $\text{FASnI}_3$  precursor solution was dropped on ITO/PEDOT:PSS substrates. CB was dripped as the anti-solvent in the 9th second and the perovskite film was annealed at 95 °C for 15 min. Next, the  $\text{PC}_{61}\text{BM}$  (20 mg/mL in CB) was spin-coated onto the perovskite film at 2000 rpm for 30 s. Finally, BCP (8nm) and Ag(100nm) layer were sequentially evaporated under a vacuum level of  $10^{-4}$  Pa. The active area of this device is  $0.04\text{cm}^2$ .

**Characterization:** X-ray photoelectron spectroscopy (XPS) were performed on the Thermo Scientific ESCA Lab 250Xi with perovskite films coated on ITO substrates. The prepared solution was subjected to Shimadzu IRPrestige-21 spectrometer with a spectral range of 4000 to  $500\text{ cm}^{-1}$ . Steady-state photoluminescence (PL) and time-resolved photoluminescence (TRPL) measurements were recorded by photoluminescence spectroscopy (FLS920, Edinburgh Instruments Ltd.) at a peak emission of approximately 840 nm (the excitation at 510 nm) for steady state and lifetime measurements. NMR measurements, X-ray diffraction (XRD) patterns and UV-visible (UV-Vis) spectra were measured on Bruker ADVANCE 400 MHz Spectrometer, D8-Discover 25 diffractometer (Bruker) and SHIMADZU UV-2600 spectrophotometer, respectively. Scanning electron microscopy (SEM) images of the perovskite film were obtained by JSM-7800F SEM. The J–V characteristics of the devices were acquired by Keithley 2400 with an AM 1.5G ( $100\text{ mW cm}^{-2}$ ). The incident photon-to-current conversion efficiency (IPCE) spectra were measured on monochrome illumination (Oriel Cornerstone 260 1/4 m monochromator with Oriel 70613NS QTH lamp) and the incident light was calibrated by a monocrystalline silicon diode. Electrical impedance spectroscopy (EIS) analysis was acquired by Zahner electrochemical workstation. Current–voltage (I–V) curves of electron-only devices and hole-only devices were measured by using a Keithley 2400 Source Meter under dark conditions.

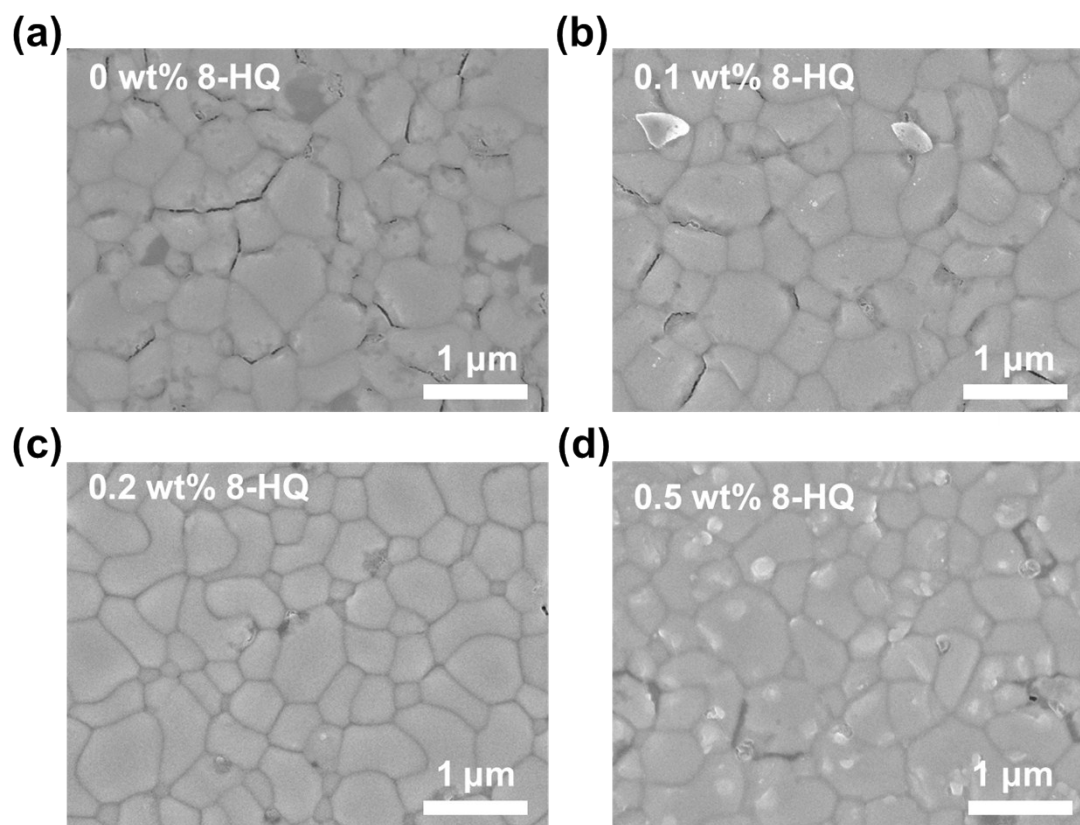

**Figure S1.** Scanning electron microscope (SEM) images of FASnI<sub>3</sub> perovskite films with different ratios of 8-HQ: 0 wt%, 0.1 wt%, 0.2 wt%, and 0.5 wt%.

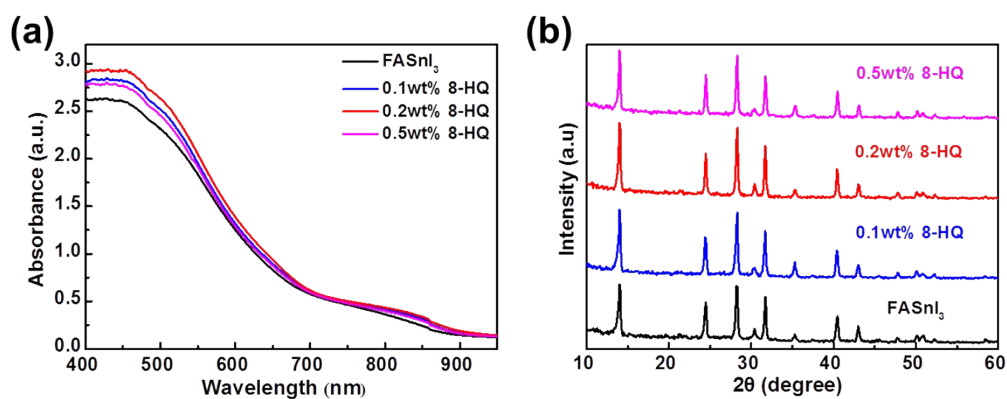

**Figure S2.** (a) UV-vis absorption spectra and (b) X-ray diffraction (XRD) patterns of FASnI<sub>3</sub> perovskite films with different ratios of 8-HQ: 0 wt%, 0.1 wt%, 0.2 wt%, and 0.5 wt%.

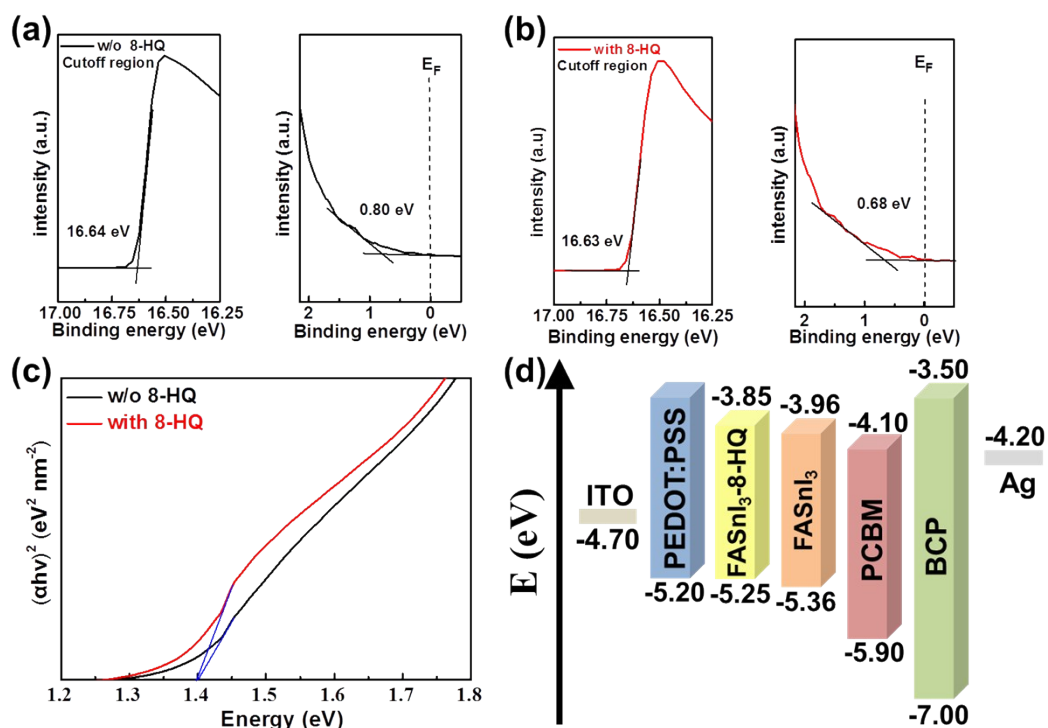

**Figure S3.** Ultraviolet photoelectron spectroscopy (UPS) of secondary electron cutoff and valence band for FASnI<sub>3</sub> perovskite films (a) without and (b) with 8-HQ. (c) The relationship of  $(\alpha h\nu)^2$  vs energy for FASnI<sub>3</sub> films without and with 8-HQ. (d) Schematic energy level diagram of the corresponding PVSCs.

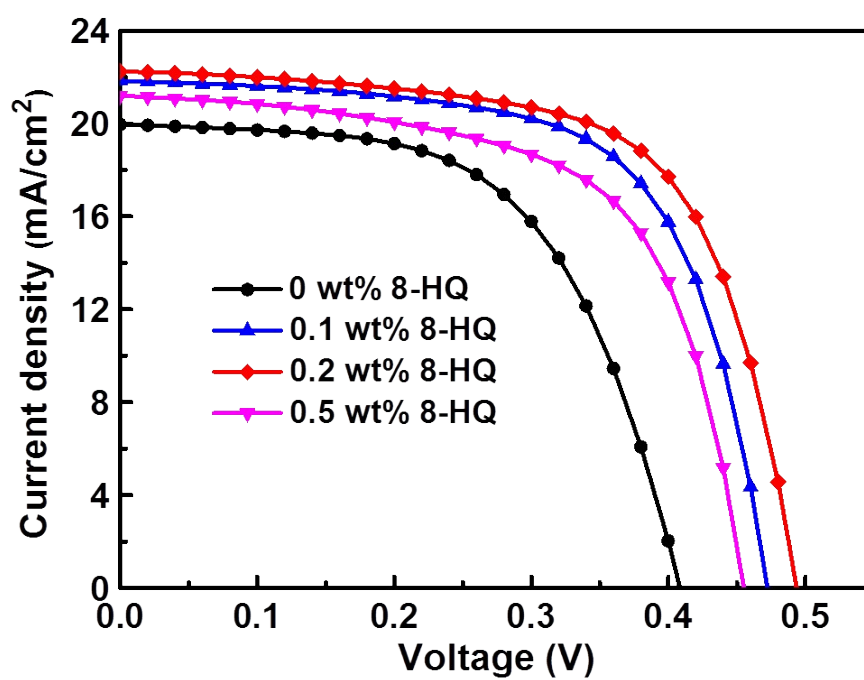

**Figure S4.** The current density-voltage ( $J$ - $V$ ) curves of FASnI<sub>3</sub>-based PVSCs with different ratios of 8-HQ: 0 wt%, 0.1 wt%, 0.2 wt%, and 0.5 wt%.

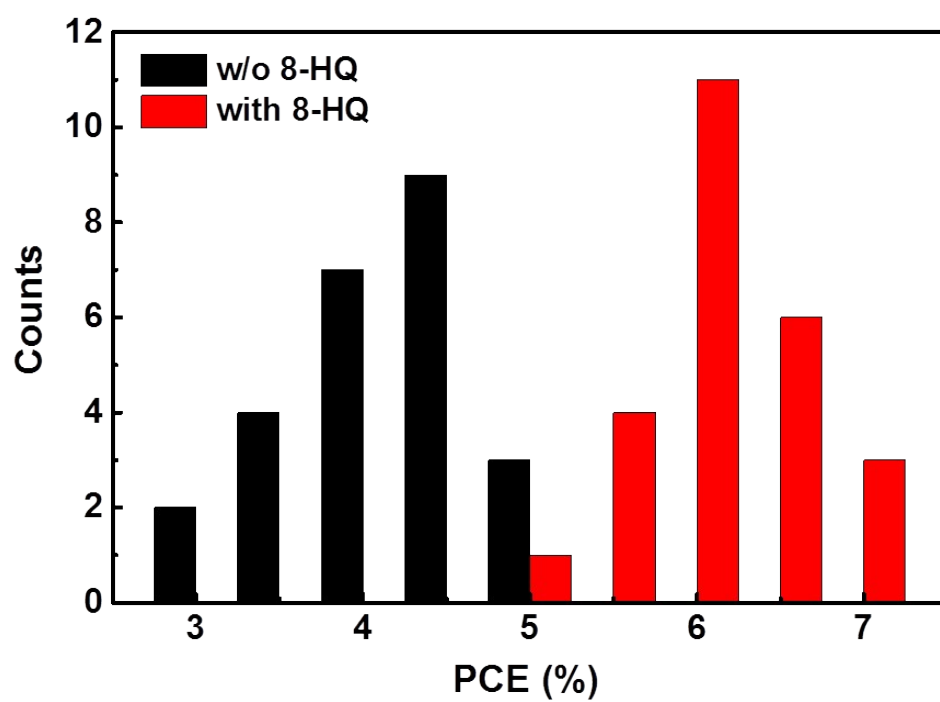

**Figure S5.** Histograms of PCE distribution for 25 devices based on FASnI<sub>3</sub> perovskite films (without and with 8-HQ).

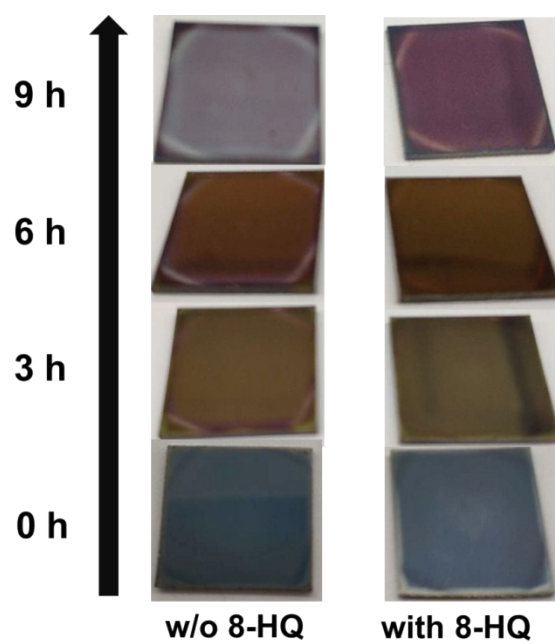

**Figure S6.** The photographs of FASnI<sub>3</sub> perovskite films without and with 8-HQ aged in air (50% relative humidity).



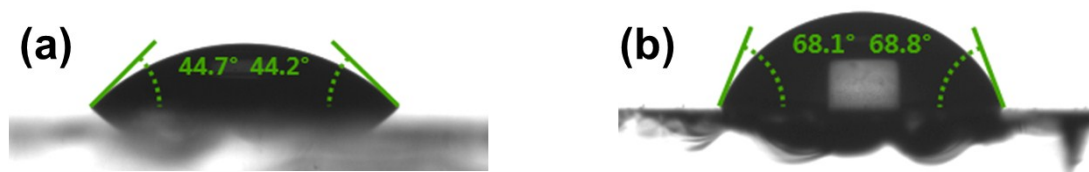

**Figure S7.** The water contact angle measurement on the FASnI<sub>3</sub> perovskite films (a) without and (b) with 8-HQ.

**Table S1.** Proportion of  $\text{Sn}^{2+}$  and  $\text{Sn}^{4+}$  in surface based on  $\text{FASnI}_3$  perovskite films (without and with 8-HQ).

| Sample    | $\text{Sn}^{2+}$ | $\text{Sn}^{4+}$ |
|-----------|------------------|------------------|
| w/o 8-HQ  | 56.84%           | 43.16%           |
| with 8-HQ | 86.08%           | 13.92%           |

**Table S2.** The photoelectric parameters of FASnI<sub>3</sub>-based PVSCs without and with 8-HQ.

| Device       | $V_{oc}$<br>(V) | FF<br>(%) | $J_{sc}$<br>(mA/cm <sup>2</sup> ) | PCE<br>(%) |
|--------------|-----------------|-----------|-----------------------------------|------------|
| 0 wt% 8-HQ   | 0.40            | 58.22     | 19.95                             | 4.74       |
| 0.1 wt% 8-HQ | 0.47            | 64.82     | 21.83                             | 6.68       |
| 0.2 wt% 8-HQ | 0.49            | 65.19     | 22.24                             | 7.15       |
| 0.5 wt% 8-HQ | 0.45            | 62.65     | 20.20                             | 5.72       |

**Table S3.** Photovoltaic parameters of 25 devices based on FASnI<sub>3</sub> perovskite films without 8-HQ.

| No.     | $V_{oc}$<br>(V) | FF<br>(%)  | $J_{sc}$<br>(mA/cm <sup>2</sup> ) | PCE<br>(%) |
|---------|-----------------|------------|-----------------------------------|------------|
| 1       | 0.408           | 58.22      | 19.95                             | 4.74       |
| 2       | 0.408           | 59.59      | 18.60                             | 4.52       |
| 3       | 0.384           | 60.18      | 19.46                             | 4.50       |
| 4       | 0.406           | 60.16      | 18.16                             | 4.44       |
| 5       | 0.384           | 58.96      | 19.41                             | 4.40       |
| 6       | 0.386           | 59.38      | 18.98                             | 4.36       |
| 7       | 0.372           | 58.50      | 19.74                             | 4.30       |
| 8       | 0.383           | 57.25      | 19.37                             | 4.26       |
| 9       | 0.394           | 56.14      | 19.17                             | 4.25       |
| 10      | 0.388           | 57.16      | 18.98                             | 4.21       |
| 11      | 0.381           | 57.80      | 18.57                             | 4.09       |
| 12      | 0.369           | 60.65      | 17.86                             | 4.00       |
| 13      | 0.361           | 60.68      | 18.17                             | 3.97       |
| 14      | 0.372           | 56.56      | 18.85                             | 3.96       |
| 15      | 0.363           | 58.53      | 18.39                             | 3.91       |
| 16      | 0.386           | 57.44      | 17.37                             | 3.85       |
| 17      | 0.366           | 56.99      | 18.27                             | 3.82       |
| 18      | 0.363           | 55.81      | 18.31                             | 3.71       |
| 19      | 0.358           | 59.87      | 16.42                             | 3.53       |
| 20      | 0.375           | 54.52      | 16.82                             | 3.44       |
| 21      | 0.351           | 55.88      | 16.98                             | 3.38       |
| 22      | 0.340           | 57.69      | 16.51                             | 3.24       |
| 23      | 0.355           | 56.01      | 16.19                             | 3.21       |
| 24      | 0.327           | 50.76      | 18.29                             | 2.86       |
| 25      | 0.326           | 50.24      | 17.24                             | 2.71       |
| Average | 0.372±0.022     | 57.39±2.66 | 18.24±1.07                        | 3.91±0.53  |

**Table S4.** Photovoltaic parameters of 25 devices based on FASnI<sub>3</sub> perovskite films with 8-HQ.

| No.     | $V_{oc}$<br>(V) | FF<br>(%)  | $J_{sc}$<br>(mA/cm <sup>2</sup> ) | PCE<br>(%) |
|---------|-----------------|------------|-----------------------------------|------------|
| 1       | 0.493           | 65.19      | 22.24                             | 7.15       |
| 2       | 0.494           | 65.03      | 21.89                             | 7.03       |
| 3       | 0.480           | 65.01      | 22.45                             | 7.02       |
| 4       | 0.492           | 64.62      | 21.83                             | 6.93       |
| 5       | 0.483           | 65.63      | 21.48                             | 6.81       |
| 6       | 0.478           | 64.60      | 21.95                             | 6.78       |
| 7       | 0.471           | 64.40      | 22.17                             | 6.72       |
| 8       | 0.477           | 64.17      | 21.54                             | 6.59       |
| 9       | 0.483           | 63.06      | 21.42                             | 6.53       |
| 10      | 0.469           | 64.08      | 21.48                             | 6.47       |
| 11      | 0.475           | 63.70      | 21.19                             | 6.42       |
| 12      | 0.477           | 61.28      | 21.93                             | 6.41       |
| 13      | 0.485           | 61.06      | 21.29                             | 6.31       |
| 14      | 0.471           | 63.88      | 20.91                             | 6.30       |
| 15      | 0.479           | 60.63      | 21.60                             | 6.28       |
| 16      | 0.481           | 60.74      | 21.35                             | 6.25       |
| 17      | 0.485           | 62.21      | 20.51                             | 6.19       |
| 18      | 0.485           | 61.29      | 20.52                             | 6.10       |
| 19      | 0.479           | 63.06      | 20.06                             | 6.07       |
| 20      | 0.482           | 61.62      | 20.35                             | 6.05       |
| 21      | 0.484           | 62.31      | 19.74                             | 5.96       |
| 22      | 0.478           | 61.94      | 19.97                             | 5.92       |
| 23      | 0.486           | 60.95      | 19.89                             | 5.90       |
| 24      | 0.483           | 60.01      | 19.86                             | 5.75       |
| 25      | 0.478           | 58.87      | 19.50                             | 5.49       |
| Average | 0.481±0.006     | 62.77±1.87 | 21.08±0.88                        | 6.37±0.42  |

**Table S5.** The trap state density and carrier mobility based on FASnI<sub>3</sub> without and with 8-HQ (hole-only and electron-only devices).

| Sample           | Hole-only devices       |                                       |                                                                     | Electron-only devices   |                                       |                                                                         |
|------------------|-------------------------|---------------------------------------|---------------------------------------------------------------------|-------------------------|---------------------------------------|-------------------------------------------------------------------------|
|                  | V <sub>TFL</sub><br>(V) | N <sub>t</sub><br>(cm <sup>-3</sup> ) | Hole mobility<br>(cm <sup>2</sup> V <sup>-1</sup> s <sup>-1</sup> ) | V <sub>TFL</sub><br>(V) | N <sub>t</sub><br>(cm <sup>-3</sup> ) | Electron mobility<br>(cm <sup>2</sup> V <sup>-1</sup> s <sup>-1</sup> ) |
| <b>w/o 8-HQ</b>  | 0.31                    | 1.21×10 <sup>16</sup>                 | 1.01×10 <sup>-3</sup>                                               | 0.25                    | 8.25×10 <sup>15</sup>                 | 2.77×10 <sup>-2</sup>                                                   |
| <b>with 8-HQ</b> | 0.22                    | 8.65×10 <sup>15</sup>                 | 3.65×10 <sup>-3</sup>                                               | 0.21                    | 9.82×10 <sup>15</sup>                 | 2.85×10 <sup>-2</sup>                                                   |
